# Supplementary material for: Liver stage malaria infection is controlled by host regulators of lipid peroxidation
Source: PubMed Central journal article supplement (PMC7206113; doi:10.1038/s41418-019-0338-1), 2019-05-07

Figure S2

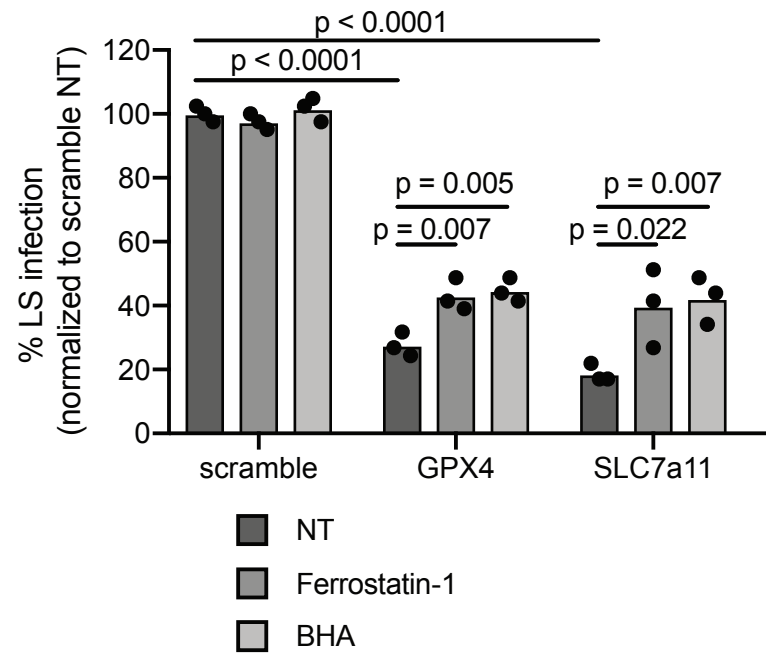

Supplement: 41418_2019_338_MOESM4_ESM.pdf [file 41418_2019_338_MOESM4_ESM.pdf]
